# Supplementary material for: High-Density EEG in a Charles Bonnet Syndrome Patient during and without Visual Hallucinations: A Case-Report Study
Source: MDPI journal article supplement (doi:10.3390/cells10081991), 2021-08-05
Supplement: s1 [file s1]

## Supplementary Material

### A. Statistical non-Parametric Mapping, SnPM

#### Single threshold test for the maximum t-statistic

We here explain the rationale of SnPM: let us assume without loss of generality to have collected an EEG feature (i.e. Lempel-Ziv Complexity), for each electrode in two different conditions (i.e. Resting State and Hallucinations), and that each condition is divided in a group of epochs (30 and 32, respectively). For each electrode, a two-sample t-test between the conditions is conducted and its t-value is collected. As the test is applied to multiple electrodes (183), a single-threshold SnPM procedure is used to assess the significance of each t-test, taking into account the multiple comparison issue. Let us consider the null-hypothesis of no significant *condition*-effect: under the null-hypothesis, the labeling of epochs can be randomly assigned (i.e. a feature estimated during a Resting State epoch can be assigned to an Hallucination epoch and vice-versa). Based on this assumption, 5000 random relabeling are conducted, and the t-values related to each single comparison (i.e electrode) are estimated. For each relabeling, only the maximum t-value (in absolute value, for two-tailed significance assessment), among simultaneous comparisons (i.e. over the electrodes) is kept for further analyses. At the end of the relabeling procedure, the maximum t-value distribution under the null-hypothesis of no significant *condition*-effect is thus obtained. The significance of each original t-value is then calculated as the ratio between the number of t-values of the null-distribution exceeding the original t-value (in absolute value) and the number of relabeling.

## B. PSD analysis

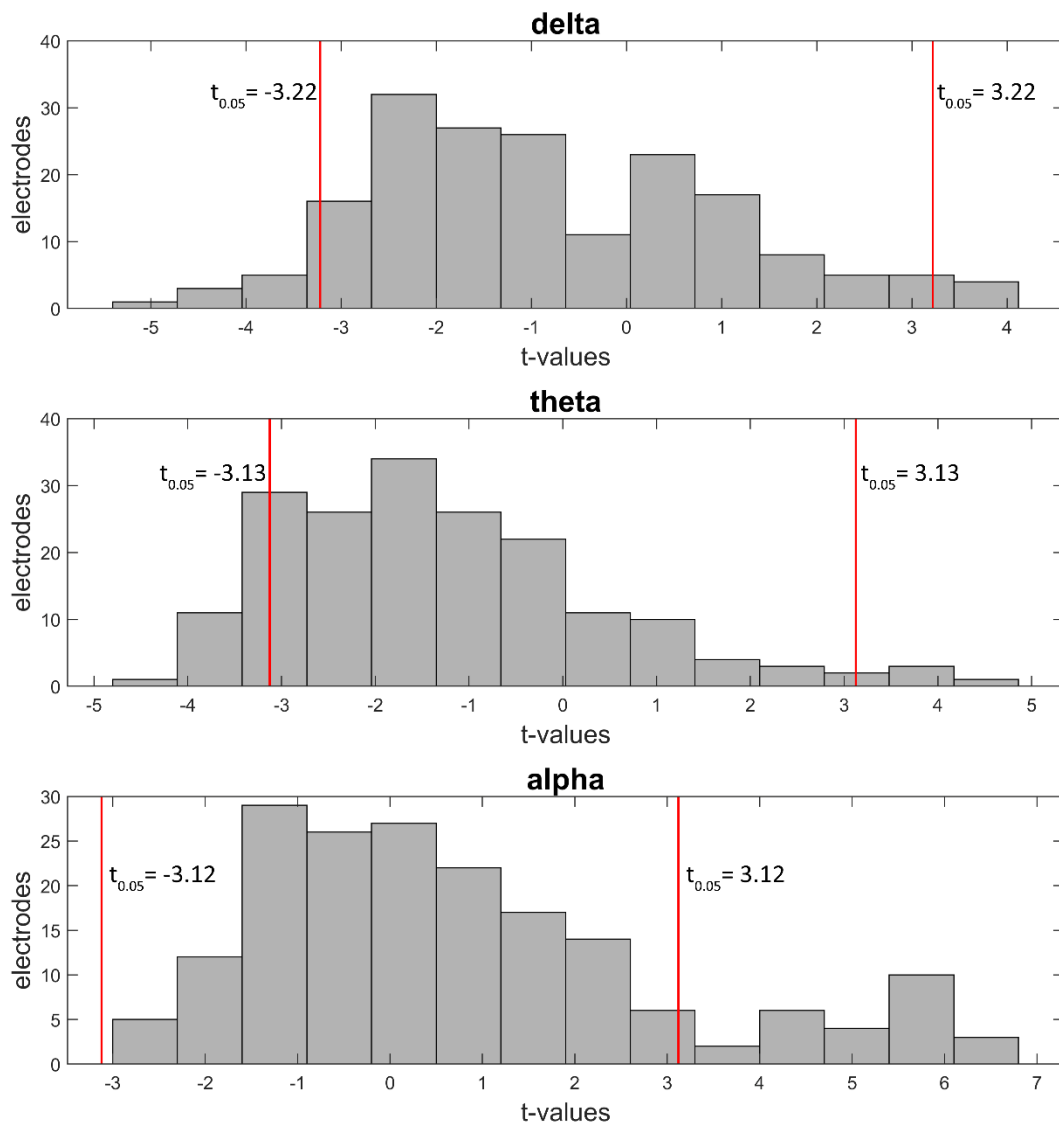

**Figure S1.** Statistics of the PSD analysis. The distributions of t-values related to the electrode-wise two-samples t-tests are presented for each band (grey bars). In each plot the t-thresholds for significance at  $p < 0.05$  (estimated using a single threshold permutation test for the maximum t-statistics, 5000 permutations), are denoted by red lines.

### C. Connectivity Analysis

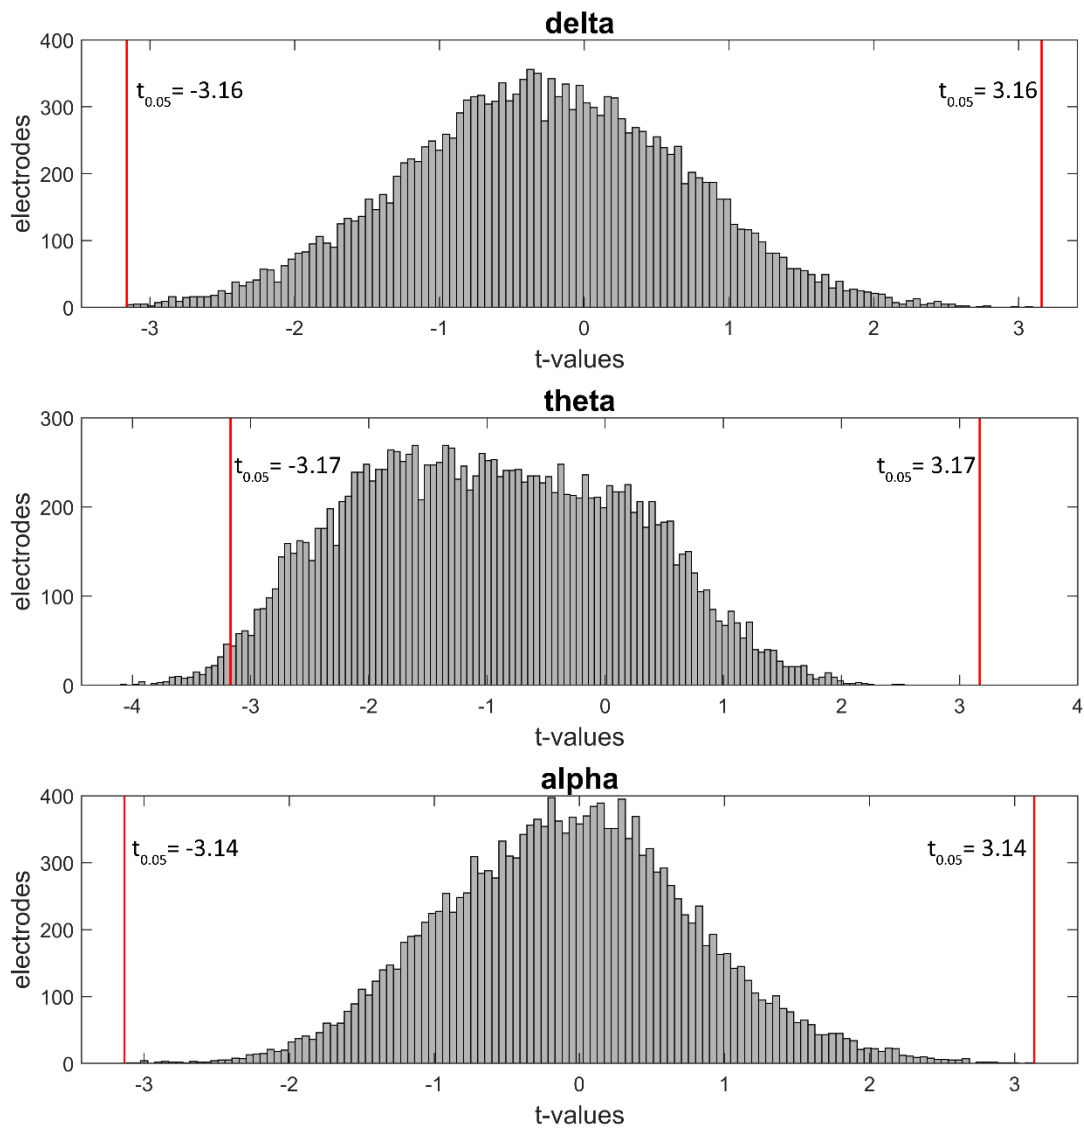

**Figure S2.** Statistics of the connectivity analysis. The distributions of t-values related to the electrode-couples two-samples t-tests are presented for each band (grey bars). In each plot the t-thresholds for significance at  $p < 0.05$  (estimated using a single threshold permutation test for the maximum t-statistics, 5000 permutations), are denoted by red lines.

## D. Graph theoretical metrics.

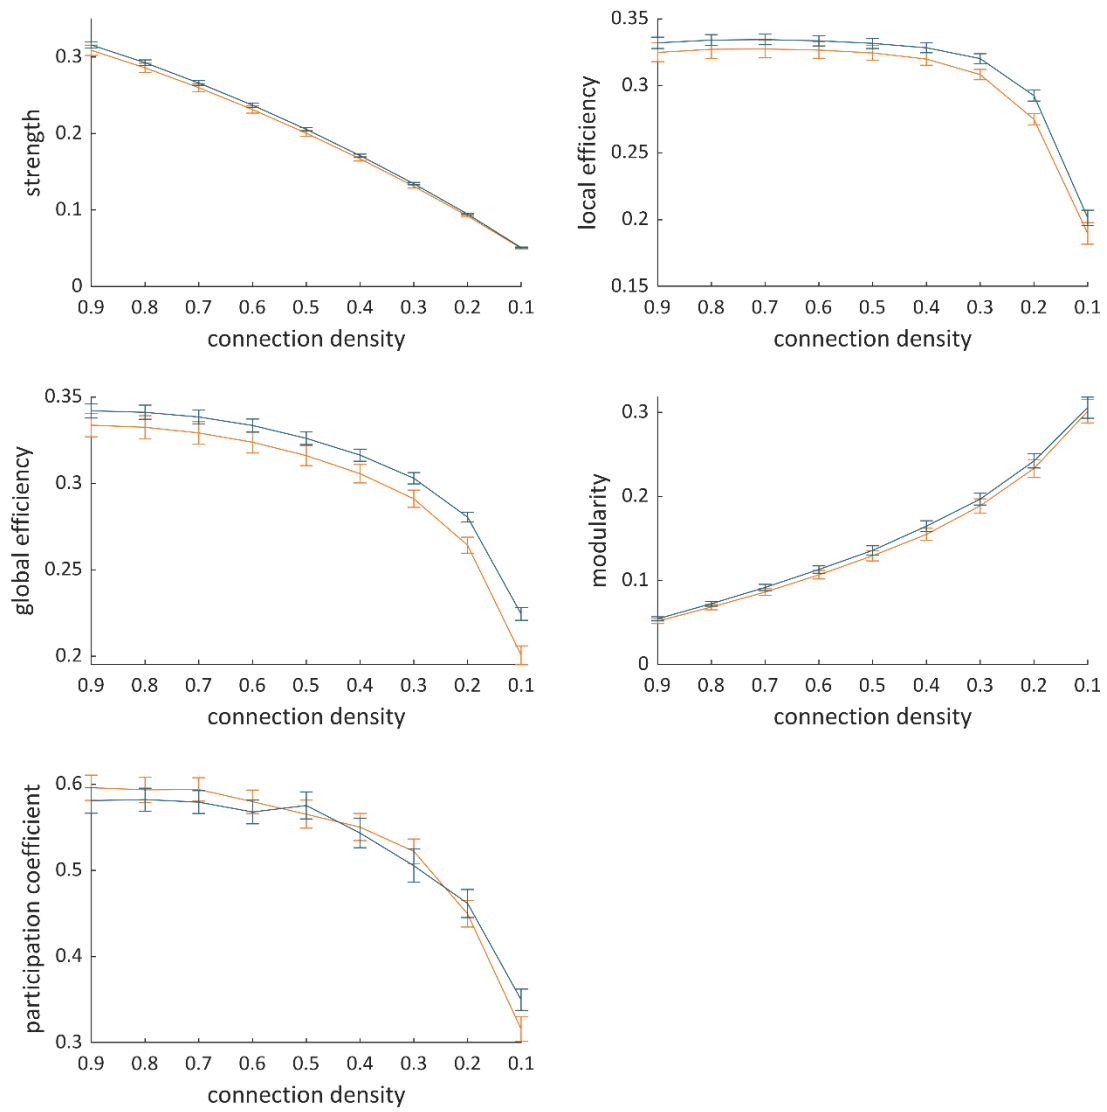

**Figure S3.** Graph theoretical metrics: Delta. Delta metrics as a function of connection density. Orange lines identify hallucinations condition while blue lines resting state condition. Error-bars denote the mean  $\pm$  standard error intervals.

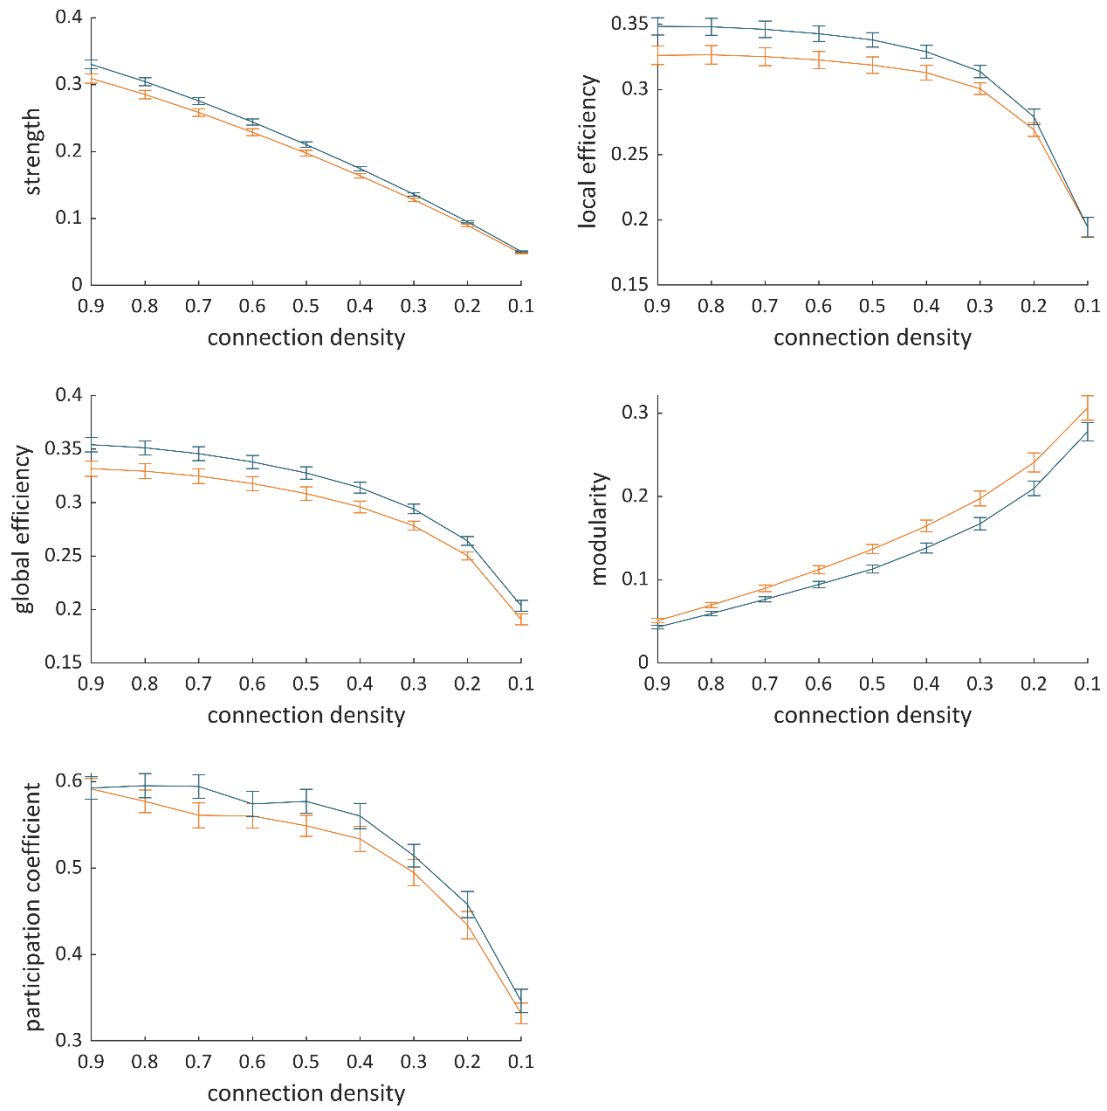

**Figure S4.** Graph theoretical metrics: Theta. Theta metrics as a function of connection density. Orange lines identify hallucinations condition while blue lines resting state condition. Error-bars denote the mean  $\pm$  standard error intervals.

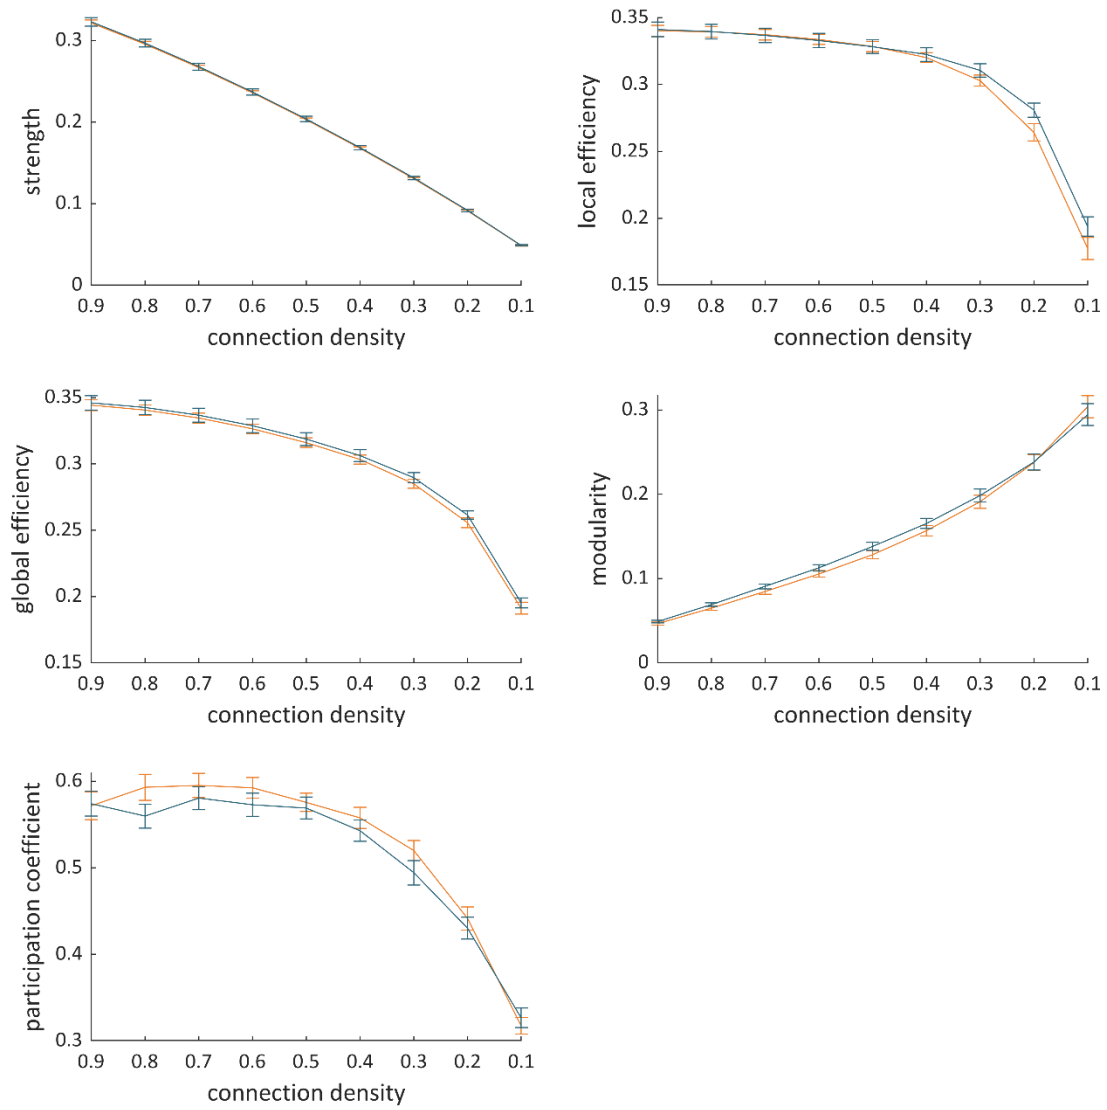

**Figure S5.** Graph theoretical metrics: Alpha. Alpha metrics as a function of connection density. Orange lines identify hallucinations condition while blue lines resting state condition. Error-bars denote the mean  $\pm$  standard error intervals.

| DELTA                     | $ t_{0.05} $ | t-value | p-value | $p_{FDR}$ |
|---------------------------|--------------|---------|---------|-----------|
| strength                  | 2.00         | -1.03   | 0.32    | 0.54      |
| local efficiency          | 2.05         | -1.80   | 0.09    | 0.23      |
| global efficiency         | 2.00         | -1.73   | 0.09    | 0.23      |
| modularity                | 2.01         | -0.78   | 0.45    | 0.57      |
| participation coefficient | 1.99         | 0.27    | 0.79    | 0.79      |

**Table S1.** Delta networks. Statistics of between-condition comparisons (visual hallucinations versus resting-state) are reported for graph each metric.  $|t_{0.05}|$  indicates the two-sided significance threshold (at  $p < 0.05$ ) derived by a permutation test on the t-statistics (5000 permutations), t-value, the t-statistics of the two sample t-test, p-value the non-corrected significance of the test (based on the permutation test), and  $p_{FDR}$  the significance after applying Benjamini-Hochberg procedure

| THETA                     | $ t_{0.05} $ | t-value | p-value | $p_{FDR}$ |
|---------------------------|--------------|---------|---------|-----------|
| <i>strength</i>           | 2.00         | -2.22   | 0.03    | 0.04      |
| <i>local efficiency</i>   | 1.99         | -2.32   | 0.02    | 0.03      |
| <i>global efficiency</i>  | 1.97         | -2.44   | 0.02    | 0.03      |
| <i>modularity</i>         | 2.02         | 2.72    | 0.01    | 0.03      |
| participation coefficient | 2.03         | -1.39   | 0.18    | 0.18      |

**Table S2.** Theta networks. Statistics of between-condition comparisons (visual hallucinations versus resting-state) are reported for graph each metric.  $|t_{0.05}|$  indicates the two-sided significance threshold (at  $p < 0.05$ ) derived by a permutation test on the t-statistics (5000 permutations), t-value, the t-statistics of the two sample t-test, p-value the non-corrected significance of the test (based on the permutation test), and  $p_{FDR}$  the significance after applying Benjamini-Hochberg procedure. Metrics showing significant between-condition differences are written in italics.

| <b>ALPHA</b>              | <b> t<sub>0.05</sub> </b> | <b>t-value</b> | <b>p-value</b> | <b>p<sub>FDR</sub></b> |
|---------------------------|---------------------------|----------------|----------------|------------------------|
| strength                  | 2.00                      | -0.26          | 0.80           | 0.80                   |
| local efficiency          | 1.97                      | -0.79          | 0.44           | 0.74                   |
| global efficiency         | 2.00                      | -0.56          | 0.59           | 0.74                   |
| modularity                | 1.98                      | -0.72          | 0.49           | 0.74                   |
| participation coefficient | 1.95                      | 1.00           | 0.31           | 0.74                   |

**Table S3.** Alpha networks. Statistics of between-condition comparisons (visual hallucinations versus resting-state) are reported for graph each metric. |t<sub>0.05</sub>| indicates the two-sided significance threshold (at  $p < 0.05$ ) derived by a permutation test on the t-statistics (5000 permutations), t-value, the t-statistics of the two sample t-test, p-value the non-corrected significance of the test (based on the permutation test), and p<sub>FDR</sub> the significance after applying Benjamini-Hochberg procedure. Metrics showing significant between-condition differences are written in italics.



## E. Lempel-Ziv Complexity

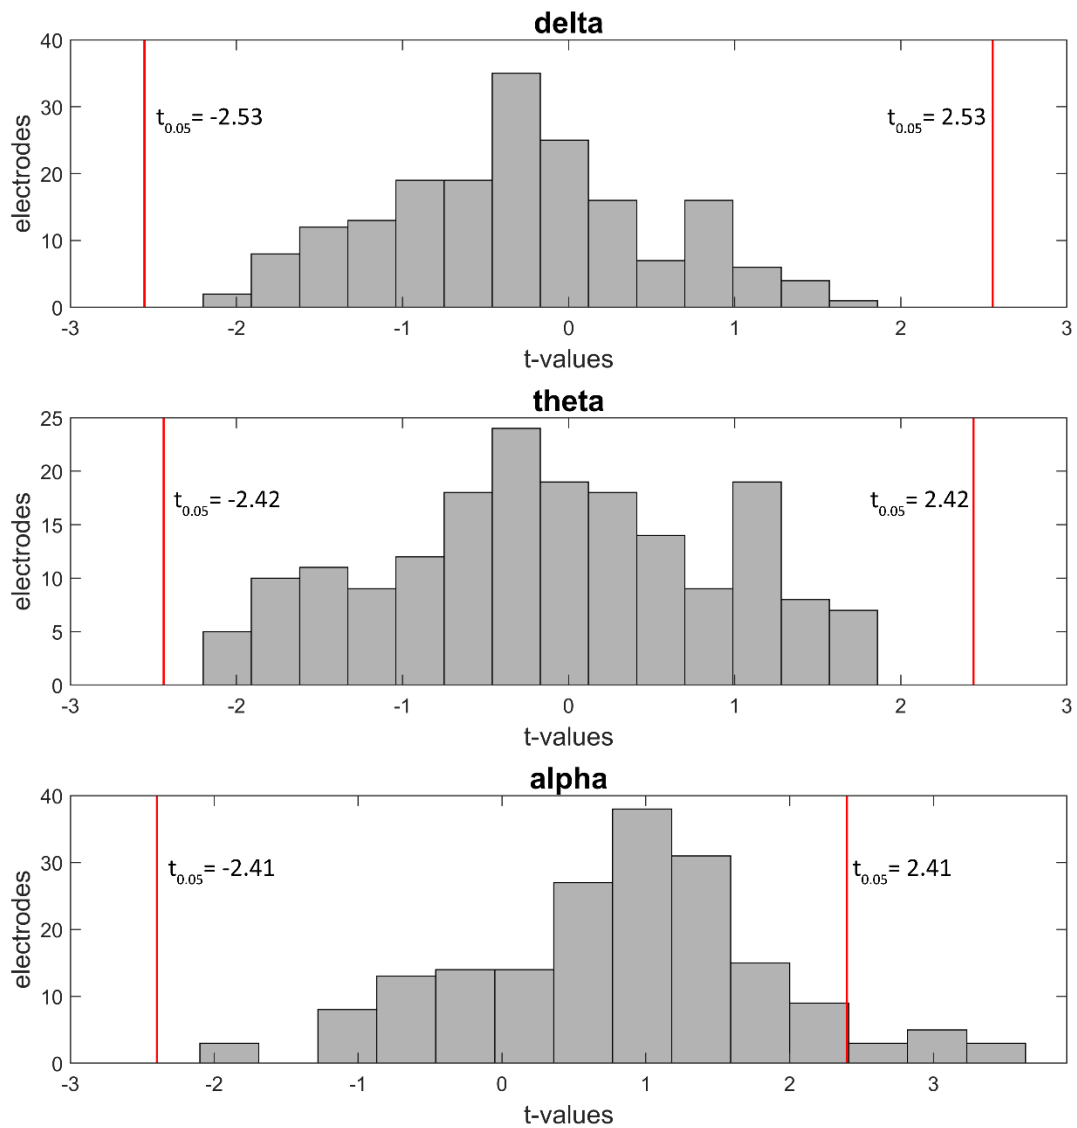

**Figure S6.** Statistics of the Lempel-Ziv Complexity. The distributions of t-values related to the electrode-wise t-test are presented for each band (grey bars). In each plot the t-thresholds for significance at  $p < 0.05$  (estimated using a single threshold permutation test for the maximum t-statistics, 5000 permutations), are denoted by red lines.
